# Supplementary material for: Theoretical prediction of donor–acceptor type novel complexes with strong noble gas–boron covalent bond
Source: Royal Society of Chemistry journal article supplement (doi:10.1039/d3cp02667a), 2024-01-01
Supplement: d3cp02667a1.pdf [file d3cp02667a1.pdf]

## **Electronic Supplementary Information**

### **Theoretical Prediction of Donor-Acceptor type Novel Complexes with Strong Noble Gas–Boron Covalent Bond**

**Subrahmanya Prasad Kuntar<sup>†,#</sup>, Ayan Ghosh<sup>§,†</sup>, and Tapan K. Ghanty<sup>#,†,\*</sup>**

*<sup>†</sup>Homi Bhabha National Institute, Training School Complex, Anushakti Nagar,  
Mumbai 400 094, INDIA.*

*<sup>§</sup>Laser and Plasma Technology Division, Beam Technology Development Group,  
Bhabha Atomic Research Centre, Mumbai 400 085, INDIA.*

*<sup>#</sup>Bio-Science Group, Bhabha Atomic Research Centre, Mumbai 400 085, INDIA.*

## **List of Figures**

**Figure S1.** The plot of natural bonding orbitals (NBO) of Ng–B bonds in NgBNH<sup>+</sup> and NgBNAu<sup>+</sup> (Ng = (a) Kr, (b) Xe, and (c) Rn) ions calculated at B3LYP-D3/TZ2P level.

**Figure S2.** Optimized geometrical parameters in graphical format for linear structures of the minima of (a) NgBNCu<sup>+</sup> and (b) NgBNAg<sup>+</sup> (Ng = He–Rn), respectively, where the bond lengths are in Å. The values in light blue, purple, black, blue, green, and red are computed at the CCSD(T)/AVTZ level of theory for He, Ne, Ar, Kr, Xe, and Rn containing complexes, respectively, and (c) represents the respective Ng–B covalent limit values in Å.

**Figure S3.** Plot of deformation densities  $\Delta\rho(r)$ , of the pair-wise orbital interactions in the predicted NgBNCu<sup>+</sup> (Ng = Kr and Xe) complexes at the B3LYP-D3/TZ2P level, where  $\Delta\rho_1(r)$ ,  $\Delta\rho_3(r)$ , and  $\Delta\rho_4(r)$  are the deformation densities corresponding to Ng  $\rightarrow$  BNCu<sup>+</sup> (Ng = Kr and Xe)  $\sigma$ -,  $\pi$ -, and  $\pi$ -donations, respectively, while  $\Delta\rho_2(r)$ ,  $\Delta\rho_5(r)$ , and  $\Delta\rho_6(r)$  correspond to Ng  $\leftarrow$  BNCu<sup>+</sup> (Ng = Kr and Xe)  $\sigma$ -,  $\pi$ -, and  $\pi$ -back donations, respectively. The associated orbital interaction energies are provided in kcal mol<sup>-1</sup>. The direction of the charge flow is from red to blue region.

**Figure S4.** Plot of deformation densities  $\Delta\rho(r)$ , of the pair-wise orbital interactions in the predicted NgBNAg<sup>+</sup> (Ng = Kr and Xe) complexes at the B3LYP-D3/TZ2P level, where  $\Delta\rho_1(r)$ ,  $\Delta\rho_3(r)$ , and  $\Delta\rho_4(r)$  are the deformation densities corresponding to Ng  $\rightarrow$  BNAg<sup>+</sup> (Ng = Kr and Xe)  $\sigma$ -,  $\pi$ -, and  $\pi$ -donations, respectively, while  $\Delta\rho_2(r)$ ,  $\Delta\rho_5(r)$ , and  $\Delta\rho_6(r)$  correspond to Ng  $\leftarrow$  BNAg<sup>+</sup> (Ng = Kr and Xe)  $\sigma$ -,  $\pi$ -, and  $\pi$ -back donations, respectively. The associated orbital interaction energies are provided in kcal mol<sup>-1</sup>. The direction of the charge flow is from red to blue region.

## **List of Tables**

**Table S1.** Calculated Values of Ng–B, B–N and N–H Bond Lengths (in Å) in the Predicted NgBNH<sup>+</sup> (Ng = He, Ne, Ar, Kr, Xe, and Rn) Ions as Obtained by Using B3LYP and MP2 Methods with DEF2 Basis Set and CCSD(T) Method with AVTZ Basis Set.

**Table S2.** Calculated Values of Ng–B, B–N and N–Au Bond Lengths (in Å) in the Predicted NgBNAu<sup>+</sup> (Ng = He, Ne, Ar, Kr, Xe, and Rn) Ions as Obtained by Using B3LYP and MP2 Methods with DEF2 Basis Set and CCSD(T) Method with AVTZ Basis Set.

**Table S3.** Comparison of Ng–B Bond Length (R in Å) and Ng–B Binding Energies (BE in kJ mol<sup>-1</sup>) (Ng = He and Xe) in the Various Donor–Acceptor Type Chemical Systems Containing Ng–B Bonding Motif at MP2/DEF2 Level of Theory.

**Table S4.** Calculated Values of the Harmonic Vibrational Frequencies (in cm<sup>-1</sup>) and Intrinsic Force Constants (in N m<sup>-1</sup>) in the Parentheses Corresponding to Individual Internal Coordinates of NgBNM<sup>+</sup> (Ng = He, Ne, Ar, Kr, Xe, and Rn; M = H and Au) Ions using B3LYP and MP2 Methods with DEF2 Basis Set.

**Table S5.** Calculated Values of Mulliken Charges on the Constituent Atoms in the Predicted NgBNM<sup>+</sup> (Ng = He–Rn; M = H and Au) Ions as Obtained by Using B3LYP and MP2 Methods with the DEF2 Basis Set.

**Table S6.** Calculated Values of Atoms-in-Molecule (AIM) Charges on the Constituent Atoms in the Predicted NgBNM<sup>+</sup> (Ng = He–Rn; M = H and Au) Ions as Obtained by Using B3LYP Method with the DEF2 Basis Set.

**Table S7.** Calculated Values of the NBO Occupancy, Contribution from the Atoms Constructing that NBO, Atomic Contributions Towards that NBO and the Wiberg Bond Index (WBI) of Ng–B Bonds in NgBNM<sup>+</sup> (Ng = He–Rn; M = H and Au) Ions Calculated at B3LYP-D3/TZ2P Level.

**Table S8.** Calculated Values of Ng–B, B–N and N–Cu Bond Lengths (in Å) in the Predicted NgBNCu<sup>+</sup> (Ng = He, Ne, Ar, Kr, Xe, and Rn) Ions as Obtained by Using B3LYP and MP2 Methods with DEF2 Basis Set and CCSD(T) Method with AVTZ Basis Set.

**Table S9.** Calculated Values of Ng–B, B–N and N–Ag Bond Lengths (in Å) in the Predicted NgBNAg<sup>+</sup> (Ng = He, Ne, Ar, Kr, Xe, and Rn) Ions as Obtained by Using B3LYP and MP2 Methods with DEF2 Basis Set and CCSD(T) Method with AVTZ Basis Set.

**Table S10.** Calculated Values of Ng–B, B–N, N–M Stretch and Ng–B–N, N–B–M Bending Frequencies (in cm<sup>-1</sup>) along with their Corresponding IR Intensities (in km mol<sup>-1</sup>) are Provided within the Parenthesis in the Predicted NgBNM<sup>+</sup> (Ng = He–Rn; M = Cu and Ag) Ions as Obtained by Using B3LYP and MP2 Methods with the DEF2 Basis Set.

**Table S11.** Calculated Values of Ng–B Binding Energies (BE) (in kJ mol<sup>-1</sup>) in the Predicted NgBNCu<sup>+</sup> and NgBNAg<sup>+</sup> (Ng = He–Rn) Ions as Obtained by Using B3LYP and MP2 Methods with the DEF2 Basis Set and CCSD(T) Method with AVTZ Basis Set.

**Table S12.** Calculated Values of NBO Charges on the Constituent Atoms in the Predicted NgBNM<sup>+</sup> (Ng = He–Rn; M = Cu and Ag) Ions as Obtained by Using B3LYP and MP2 Methods with the AVTZ Basis Set Using MOLPRO Program.

**Table S13.** Calculated Values of Ng–B Bond Critical Point (BCP) Electron Density ( $\rho$  in e a<sub>0</sub><sup>-3</sup>), Laplacian of Electron Density ( $\nabla^2\rho$  in e a<sub>0</sub><sup>-5</sup>), the Local Electron Energy Density ( $E_d$  in a.u.), and Ratio of Local Electron Kinetic Energy Density and Electron Density ( $G/\rho$  in a.u.) in the Predicted NgBNM<sup>+</sup> (Ng = He–Rn; M = Cu and Ag) Complexes as Obtained by Using B3LYP and MP2 Methods with the DEF2 Basis Set.

**Table S14:** EDA-NOCV Results of NgBNM<sup>+</sup> (Ng = He–Rn; M = Cu and Ag) Ions Considering Ng as One Fragment and BNM<sup>+</sup> as Another Fragment at the B3LYP-D3/TZ2P Level of Theory. All Energy Terms are Expressed in kcal mol<sup>-1</sup>.

## NgBNH<sup>+</sup>

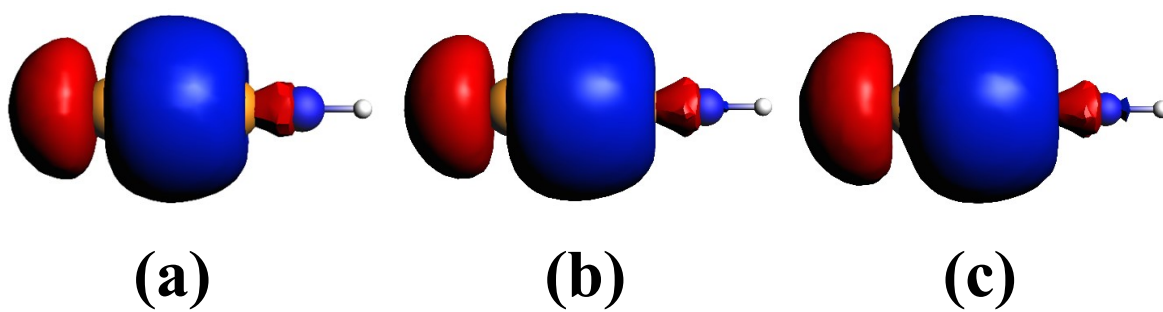

## NgBNAu<sup>+</sup>

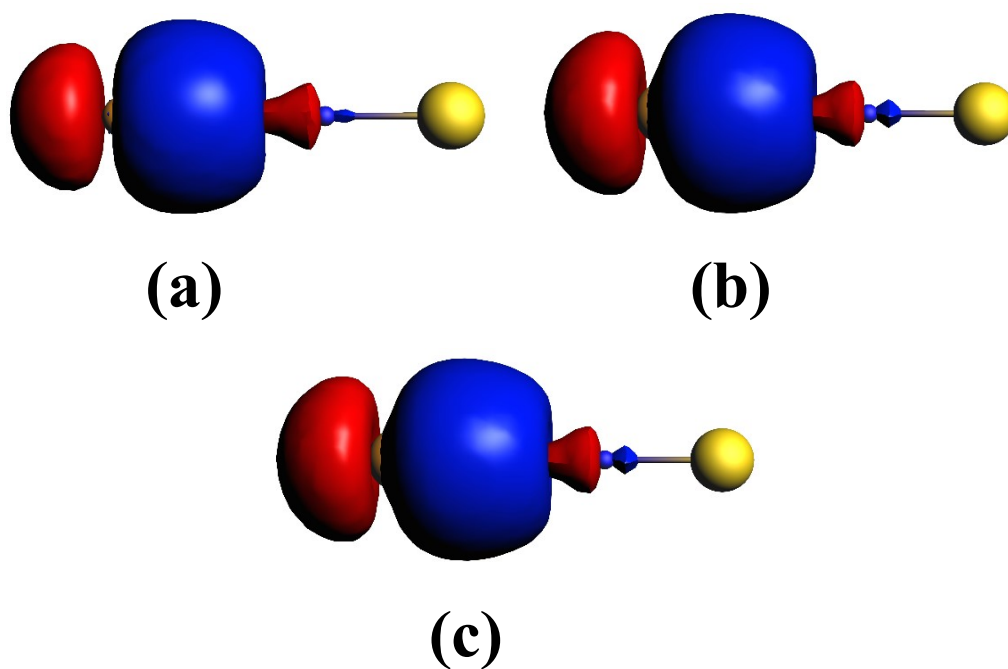

**Figure S1.** The plot of natural bonding orbitals (NBO) of Ng–B bonds in NgBNH<sup>+</sup> and NgBNAu<sup>+</sup> (Ng = (a) Kr, (b) Xe, and (c) Rn) ions calculated at B3LYP-D3/TZ2P level.

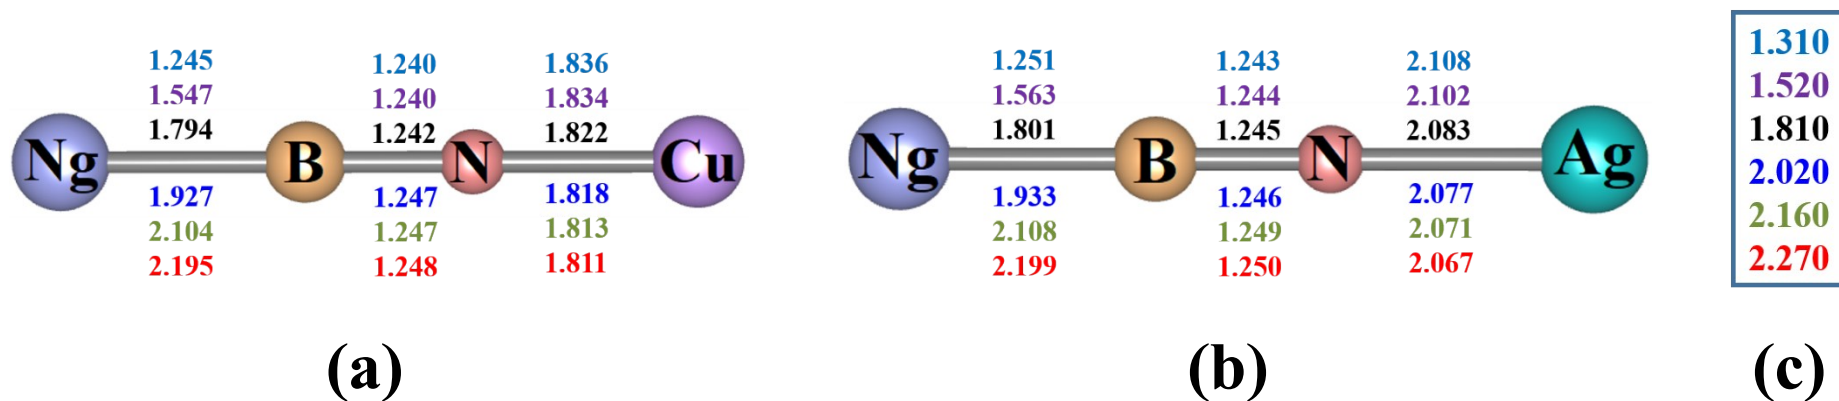

**Figure S2.** Optimized geometrical parameters in graphical format for linear structures of the minima of (a) NgBNCu<sup>+</sup> and (b) NgBNAg<sup>+</sup> (Ng = He–Rn), respectively, where the bond lengths are in Å. The values in light blue, purple, black, blue, green, and red are computed at the CCSD(T)/AVTZ level of theory for He, Ne, Ar, Kr, Xe, and Rn containing complexes, respectively, and (c) represents the respective Ng–B covalent limit values in Å.

### KrBNCu<sup>+</sup> (Kr + BNCu<sup>+</sup>)

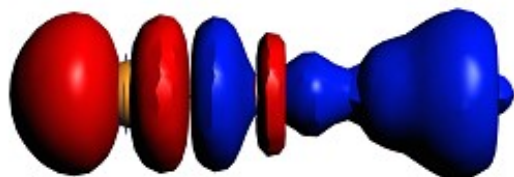

$\Delta\rho_1(\sigma_1)$

$\Delta E = -77.3$

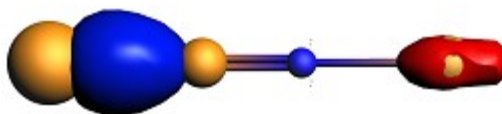

$\Delta\rho_2(\sigma_2)$

$\Delta E = -11.3$

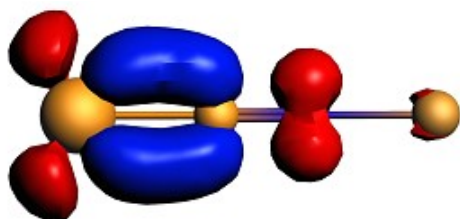

$\Delta\rho_3(\pi_1)$

$\Delta E = -10.1$

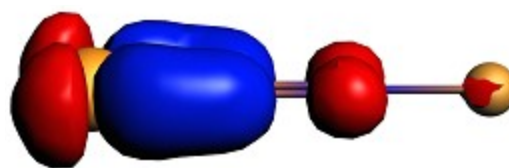

$\Delta\rho_4(\pi_2)$

$\Delta E = -10.1$

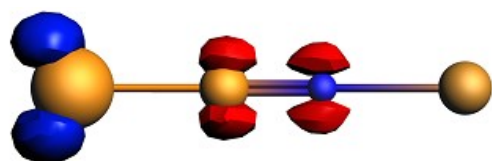

$\Delta\rho_5(\pi_3)$

$\Delta E = -0.1$

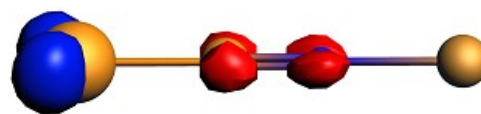

$\Delta\rho_6(\pi_4)$

$\Delta E = -0.1$

### XeBNCu<sup>+</sup> (Xe + BNCu<sup>+</sup>)

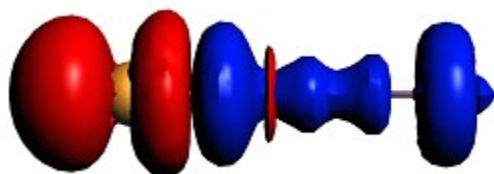

$\Delta\rho_1(\sigma_1)$

$\Delta E = -91.8$

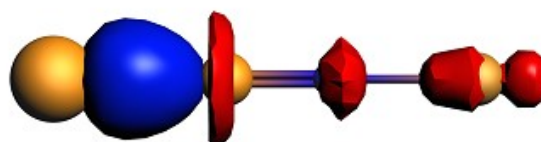

$\Delta\rho_2(\sigma_2)$

$\Delta E = -9.9$

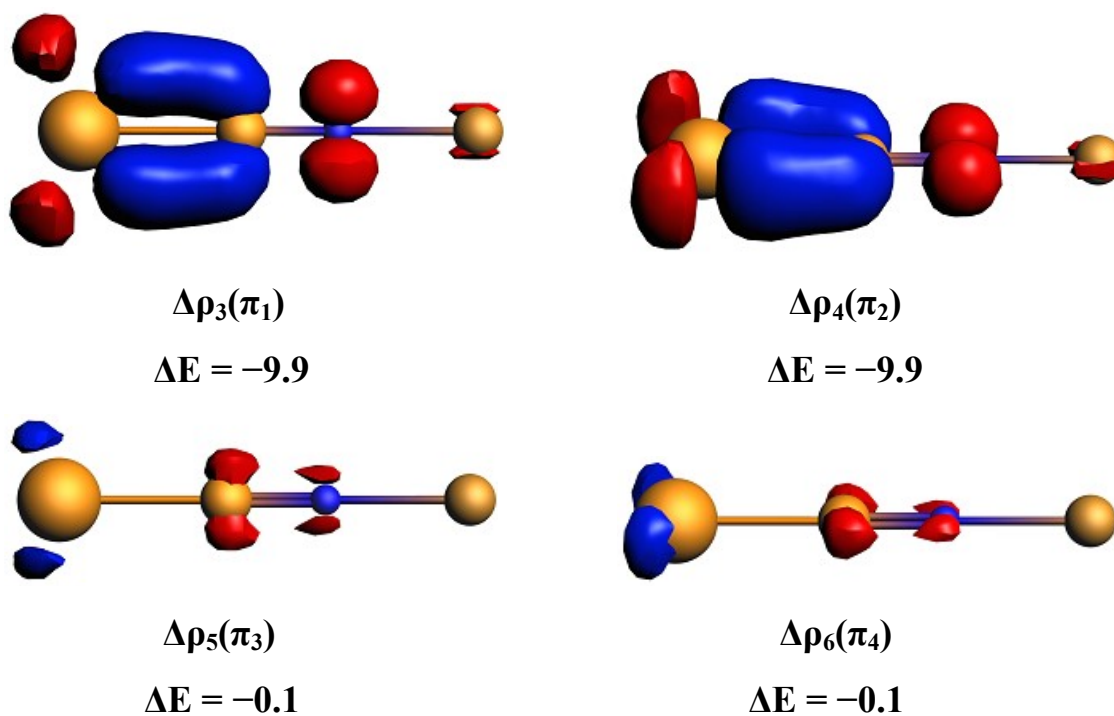

**Figure S3.** Plot of deformation densities  $\Delta\rho(r)$ , of the pair-wise orbital interactions in the predicted  $\text{NgBNCu}^+$  ( $\text{Ng} = \text{Kr}$  and  $\text{Xe}$ ) complexes at the B3LYP-D3/TZ2P level, where  $\Delta\rho_1(r)$ ,  $\Delta\rho_3(r)$ , and  $\Delta\rho_4(r)$  are the deformation densities corresponding to  $\text{Ng} \rightarrow \text{BNCu}^+$  ( $\text{Ng} = \text{Kr}$  and  $\text{Xe}$ )  $\sigma$ -,  $\pi$ -, and  $\pi$ -donations, respectively, while  $\Delta\rho_2(r)$ ,  $\Delta\rho_5(r)$ , and  $\Delta\rho_6(r)$  correspond to  $\text{Ng} \leftarrow \text{BNCu}^+$  ( $\text{Ng} = \text{Kr}$  and  $\text{Xe}$ )  $\sigma$ -,  $\pi$ -, and  $\pi$ -back donations, respectively. The associated orbital interaction energies are provided in  $\text{kcal mol}^{-1}$ . The direction of the charge flow is from red to blue region.



### KrBNAg<sup>+</sup> (Kr + BNAg<sup>+</sup>)

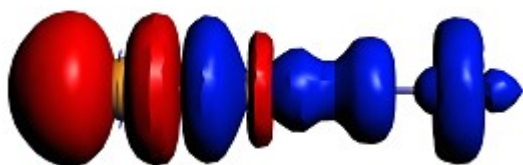

$\Delta\rho_1(\sigma_1)$   
 $\Delta E = -76.6$

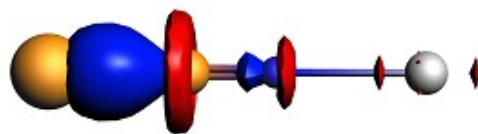

$\Delta\rho_2(\sigma_2)$   
 $\Delta E = -8.4$

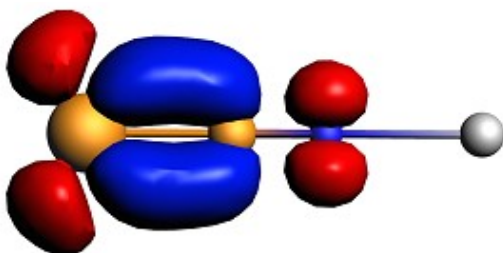

$\Delta\rho_3(\pi_1)$   
 $\Delta E = -9.4$

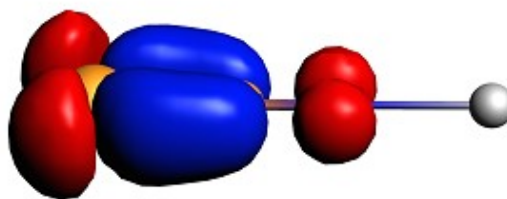

$\Delta\rho_4(\pi_2)$   
 $\Delta E = -9.4$

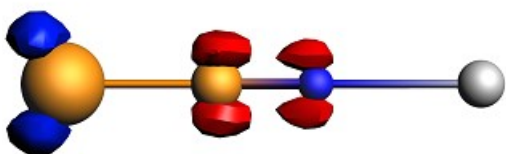

$\Delta\rho_5(\pi_3)$   
 $\Delta E = -0.1$

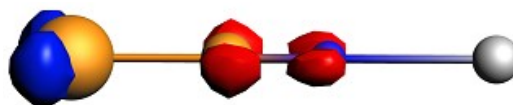

$\Delta\rho_6(\pi_4)$   
 $\Delta E = -0.1$

### XeBNAg<sup>+</sup> (Xe + BNAg<sup>+</sup>)

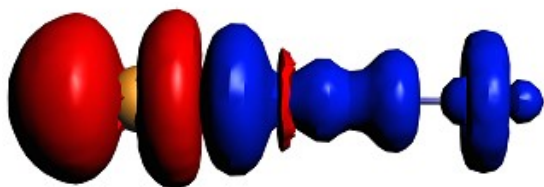

$\Delta\rho_1(\sigma_1)$   
 $\Delta E = -90.4$

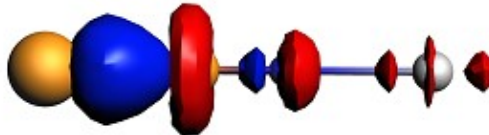

$\Delta\rho_2(\sigma_2)$   
 $\Delta E = -7.2$

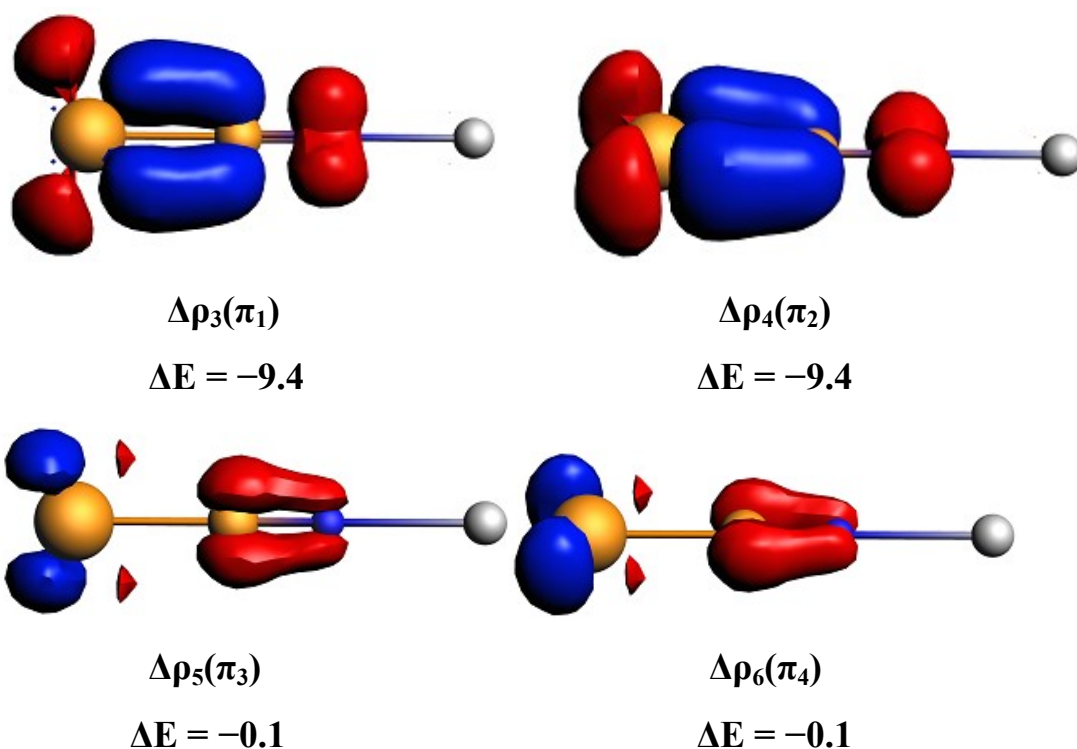

**Figure S4.** Plot of deformation densities  $\Delta\rho(r)$ , of the pair-wise orbital interactions in the predicted  $\text{NgBNAg}^+$  ( $\text{Ng} = \text{Kr}$  and  $\text{Xe}$ ) complexes at the B3LYP-D3/TZ2P level, where  $\Delta\rho_1(r)$ ,  $\Delta\rho_3(r)$ , and  $\Delta\rho_4(r)$  are the deformation densities corresponding to  $\text{Ng} \rightarrow \text{BNAg}^+$  ( $\text{Ng} = \text{Kr}$  and  $\text{Xe}$ )  $\sigma$ -,  $\pi$ -, and  $\pi$ -donations, respectively, while  $\Delta\rho_2(r)$ ,  $\Delta\rho_5(r)$ , and  $\Delta\rho_6(r)$  correspond to  $\text{Ng} \leftarrow \text{BNAg}^+$  ( $\text{Ng} = \text{Kr}$  and  $\text{Xe}$ )  $\sigma$ -,  $\pi$ -, and  $\pi$ -back donations, respectively. The associated orbital interaction energies are provided in  $\text{kcal mol}^{-1}$ . The direction of the charge flow is from red to blue region.

**Table S1. Calculated Values of Ng–B, B–N and N–H Bond Lengths (in Å) in the Predicted NgBNH<sup>+</sup> (Ng = He, Ne, Ar, Kr, Xe, and Rn) Ions as Obtained by Using B3LYP and MP2 Methods with DEF2 Basis Set and CCSD(T) Method with AVTZ Basis Set.**

| <b>Ions</b>              | <b>Method</b>  | <b>R (Ng–B)</b> | <b>R (B–N)</b> | <b>R (N–H)</b> |
|--------------------------|----------------|-----------------|----------------|----------------|
| <b>BNH<sup>+</sup></b>   | <b>B3LYP</b>   | ...             | 1.200          | 1.010          |
|                          | <b>MP2</b>     | ...             | 1.218          | 1.009          |
|                          | <b>CCSD(T)</b> | ...             | 1.215          | 1.009          |
| <b>HeBNH<sup>+</sup></b> | <b>B3LYP</b>   | 1.232           | 1.202          | 1.007          |
|                          | <b>MP2</b>     | 1.227           | 1.219          | 1.006          |
|                          | <b>CCSD(T)</b> | 1.230           | 1.217          | 1.006          |
| <b>NeBNH<sup>+</sup></b> | <b>B3LYP</b>   | 1.505           | 1.202          | 1.005          |
|                          | <b>MP2</b>     | 1.502           | 1.217          | 1.004          |
|                          | <b>CCSD(T)</b> | 1.501           | 1.215          | 1.005          |
| <b>ArBNH<sup>+</sup></b> | <b>B3LYP</b>   | 1.769           | 1.209          | 1.002          |
|                          | <b>MP2</b>     | 1.762           | 1.223          | 1.002          |
|                          | <b>CCSD(T)</b> | 1.772           | 1.221          | 1.002          |
| <b>KrBNH<sup>+</sup></b> | <b>B3LYP</b>   | 1.915           | 1.212          | 1.001          |
|                          | <b>MP2</b>     | 1.904           | 1.226          | 1.002          |
|                          | <b>CCSD(T)</b> | 1.909           | 1.224          | 1.002          |
| <b>XeBNH<sup>+</sup></b> | <b>B3LYP</b>   | 2.095           | 1.215          | 1.000          |
|                          | <b>MP2</b>     | 2.080           | 1.230          | 1.001          |
|                          | <b>CCSD(T)</b> | 2.092           | 1.228          | 1.001          |
| <b>RnBNH<sup>+</sup></b> | <b>B3LYP</b>   | 2.188           | 1.216          | 1.000          |
|                          | <b>MP2</b>     | 2.173           | 1.231          | 1.000          |
|                          | <b>CCSD(T)</b> | 2.184           | 1.229          | 1.000          |

**Table S2. Calculated Values of Ng–B, B–N and N–Au Bond Lengths (in Å) in the Predicted NgBNAu<sup>+</sup> (Ng = He, Ne, Ar, Kr, Xe, and Rn) Ions as Obtained by Using B3LYP and MP2 Methods with DEF2 Basis Set and CCSD(T) Method with AVTZ Basis Set.**

| <b>Ions</b>               | <b>Method</b>  | <b>R (Ng–B)</b> | <b>R (B–N)</b> | <b>R (N–Au)</b> |
|---------------------------|----------------|-----------------|----------------|-----------------|
| <b>BNAu<sup>+</sup></b>   | <b>B3LYP</b>   | ...             | 1.238          | 1.950           |
|                           | <b>MP2</b>     | ...             | 1.296          | 1.955           |
|                           | <b>CCSD(T)</b> | ...             | 1.264          | 1.952           |
| <b>HeBNAu<sup>+</sup></b> | <b>B3LYP</b>   | 1.237           | 1.219          | 1.968           |
|                           | <b>MP2</b>     | 1.235           | 1.242          | 1.948           |
|                           | <b>CCSD(T)</b> | 1.239           | 1.235          | 1.977           |
| <b>NeBNAu<sup>+</sup></b> | <b>B3LYP</b>   | 1.541           | 1.220          | 1.969           |
|                           | <b>MP2</b>     | 1.539           | 1.242          | 1.948           |
|                           | <b>CCSD(T)</b> | 1.537           | 1.234          | 1.976           |
| <b>ArBNAu<sup>+</sup></b> | <b>B3LYP</b>   | 1.783           | 1.223          | 1.957           |
|                           | <b>MP2</b>     | 1.776           | 1.244          | 1.934           |
|                           | <b>CCSD(T)</b> | 1.788           | 1.237          | 1.962           |
| <b>KrBNAu<sup>+</sup></b> | <b>B3LYP</b>   | 1.927           | 1.225          | 1.954           |
|                           | <b>MP2</b>     | 1.915           | 1.246          | 1.930           |
|                           | <b>CCSD(T)</b> | 1.921           | 1.239          | 1.958           |
| <b>XeBNAu<sup>+</sup></b> | <b>B3LYP</b>   | 2.102           | 1.228          | 1.949           |
|                           | <b>MP2</b>     | 2.086           | 1.249          | 1.924           |
|                           | <b>CCSD(T)</b> | 2.099           | 1.242          | 1.953           |
| <b>RnBNAu<sup>+</sup></b> | <b>B3LYP</b>   | 2.195           | 1.229          | 1.947           |
|                           | <b>MP2</b>     | 2.178           | 1.250          | 1.922           |
|                           | <b>CCSD(T)</b> | 2.190           | 1.243          | 1.950           |

**Table S3. Comparison of Ng–B Bond Length (R in Å) and Ng–B Binding Energies (BE in kJ mol<sup>-1</sup>) (Ng = He and Xe) in the Various Donor–Acceptor Type Chemical Systems Containing Ng–B Bonding Motif at MP2/DEF2 Level of Theory.**

| Ions                                                          | R (Ng–B) |       | BE(Ng–B) |       |
|---------------------------------------------------------------|----------|-------|----------|-------|
|                                                               | He       | Xe    | He       | Xe    |
| <sup>a</sup> NgBNH <sup>+</sup>                               | 1.227    | 2.080 | 135.5    | 398.3 |
| <sup>a</sup> NgBNAu <sup>+</sup>                              | 1.235    | 2.086 | 75.1     | 299.8 |
| <sup>b</sup> NgBO <sup>+</sup>                                | 1.243    | 2.084 | 120.9    | 426.5 |
| <sup>b</sup> NgBS <sup>+</sup>                                | 1.268    | 2.102 | 76.7     | 331.6 |
| <sup>c</sup> Ng <sub>3</sub> B <sub>3</sub> <sup>+</sup>      | 1.510    | 2.240 | 4.1      | 119.4 |
| <sup>c</sup> Ng <sub>4</sub> B <sub>4</sub> <sup>2+</sup>     | 1.379    | 2.298 | 39.2     | 234.5 |
| <sup>c</sup> Ng <sub>5</sub> B <sub>5</sub> <sup>3+</sup>     | 1.372    | 2.257 | 53.2     | 278.4 |
| <sup>c</sup> Ng <sub>6</sub> B <sub>6</sub> <sup>4+</sup>     | 1.374    | 2.245 | 66.1     | 370.3 |
| <sup>d</sup> NgBH <sub>3</sub> BF <sup>2+</sup>               | 1.232    | 2.091 | 152.4    | 554.0 |
| <sup>d</sup> NgBH <sub>3</sub> BH <sup>2+</sup>               | 1.241    | 2.095 | 144.4    | 551.6 |
| <sup>d</sup> NgBH <sub>3</sub> BCH <sub>3</sub> <sup>2+</sup> | 1.242    | 2.098 | 129.8    | 495.2 |

<sup>a</sup>Presently reported systems; <sup>b</sup>Ref. 62; <sup>c</sup>Ref. 58; <sup>d</sup>Ref. 11

**Table S4. Calculated Values of the Harmonic Vibrational Frequencies (in  $\text{cm}^{-1}$ ) and Intrinsic Force Constants (in  $\text{N m}^{-1}$ ) in the Parentheses Corresponding to Individual Internal Coordinates of  $\text{NgBNM}^+$  ( $\text{Ng} = \text{He, Ne, Ar, Kr, Xe, and Rn}$ ;  $\text{M} = \text{H and Au}$ ) Ions using B3LYP and MP2 Methods with DEF2 Basis Set.**

| Ions               | M  | Ng–B Stretch      |                   | B–N Stretch        |                    | N–M Stretch       |                   | Ng–B–N Bend |       | B–N–M Bend |       |
|--------------------|----|-------------------|-------------------|--------------------|--------------------|-------------------|-------------------|-------------|-------|------------|-------|
|                    |    | B3LYP             | MP2               | B3LYP              | MP2                | B3LYP             | MP2               | B3LYP       | MP2   | B3LYP      | MP2   |
| HeBNM <sup>+</sup> | H  | 1123.6<br>(277.8) | 1131.4<br>(286.9) | 2148.4<br>(1640.6) | 2049.2<br>(1470.6) | 3698.6<br>(744.1) | 3714.9<br>(751.8) | 276.5       | 255.7 | 689.8      | 665.2 |
|                    | Au | 1083.7<br>(251.8) | 1084.6<br>(255.8) | 2116.3<br>(1469.9) | 1983.2<br>(1252.2) | 380.8<br>(226.7)  | 390.5<br>(257.7)  | 231.1       | 182.1 | 165.5      | 172.8 |
| NeBNM <sup>+</sup> | H  | 574.8<br>(229.2)  | 635.5<br>(245.9)  | 2123.5<br>(1646.2) | 2038.7<br>(1503.1) | 3717.5<br>(752.1) | 3736.8<br>(760.8) | 236.3       | 236.9 | 655.2      | 635.5 |
|                    | Au | 600.6<br>(183.3)  | 628.9<br>(202.1)  | 2079.2<br>(1458.5) | 1960.0<br>(1264.9) | 268.2<br>(232.1)  | 272.1<br>(265.7)  | 100.2       | 188.8 | 215.3      | 118.6 |
| ArBNM <sup>+</sup> | H  | 530.9<br>(264.0)  | 550.0<br>(296.2)  | 2089.1<br>(1579.6) | 2017.4<br>(1454.6) | 3748.5<br>(766.0) | 3761.4<br>(771.8) | 257.4       | 248.2 | 643.8      | 635.8 |
|                    | Au | 642.1<br>(246.8)  | 672.5<br>(278.5)  | 2073.3<br>(1436.6) | 1973.6<br>(1266.5) | 231.9<br>(248.9)  | 238.1<br>(284.0)  | 261.7       | 234.4 | 104.1      | 107.3 |
| KrBNM <sup>+</sup> | H  | 457.5<br>(244.7)  | 477.8<br>(278.9)  | 2072.3<br>(1559.3) | 1999.8<br>(1435.3) | 3758.1<br>(770.3) | 3767.4<br>(774.5) | 252.0       | 244.2 | 635.5      | 629.1 |
|                    | Au | 612.6<br>(233.8)  | 645.0<br>(268.7)  | 2061.2<br>(1422.9) | 1961.6<br>(1254.1) | 178.9<br>(254.1)  | 184.5<br>(289.5)  | 260.9       | 236.2 | 97.0       | 99.9  |
| XeBNM <sup>+</sup> | H  | 417.7<br>(220.0)  | 438.7<br>(253.1)  | 2047.6<br>(1528.6) | 1974.6<br>(1406.9) | 3769.4<br>(775.4) | 3775.1<br>(778.0) | 242.3       | 238.0 | 626.0      | 623.9 |
|                    | Au | 599.6<br>(215.1)  | 632.6<br>(249.8)  | 2042.1<br>(1400.3) | 1942.8<br>(1233.9) | 153.7<br>(260.5)  | 159.4<br>(296.6)  | 256.8       | 236.8 | 91.1       | 94.0  |
| RnBNM <sup>+</sup> | H  | 387.7<br>(202.9)  | 407.0<br>(233.0)  | 2037.5<br>(1518.1) | 1964.1<br>(1397.8) | 3775.3<br>(778.1) | 3780.1<br>(780.3) | 235.3       | 230.9 | 618.5      | 615.8 |
|                    | Au | 586.8<br>(199.5)  | 618.9<br>(231.7)  | 2033.6<br>(1391.6) | 1934.4<br>(1227.0) | 131.3<br>(263.7)  | 136.2<br>(300.3)  | 249.7       | 229.6 | 87.8       | 90.5  |

**Table S5. Calculated Values of Mulliken Charges on the Constituent Atoms in the Predicted NgBNM<sup>+</sup> (Ng = He–Rn; M = H and Au) Ions as Obtained by Using B3LYP and MP2 Methods with the DEF2 Basis Set.**

| Ions                      | <i>q</i> (Ng) |       | <i>q</i> (B) |        | <i>q</i> (N) |       | <i>q</i> (H)  |       |
|---------------------------|---------------|-------|--------------|--------|--------------|-------|---------------|-------|
|                           | B3LYP         | MP2   | B3LYP        | MP2    | B3LYP        | MP2   | B3LYP         | MP2   |
| <b>HeBNH<sup>+</sup></b>  | 0.088         | 0.063 | −0.027       | 0.061  | 0.648        | 0.583 | 0.291         | 0.293 |
| <b>NeBNH<sup>+</sup></b>  | 0.211         | 0.207 | −0.277       | −0.182 | 0.778        | 0.675 | 0.288         | 0.301 |
| <b>ArBNH<sup>+</sup></b>  | 0.400         | 0.387 | −0.111       | 0.064  | 0.440        | 0.272 | 0.270         | 0.277 |
| <b>KrBNH<sup>+</sup></b>  | 0.376         | 0.338 | 0.032        | 0.186  | 0.338        | 0.207 | 0.255         | 0.268 |
| <b>XeBNH<sup>+</sup></b>  | 0.661         | 0.660 | −0.226       | −0.037 | 0.324        | 0.128 | 0.240         | 0.249 |
| <b>RnBNH<sup>+</sup></b>  | 0.639         | 0.647 | −0.166       | 0.014  | 0.292        | 0.096 | 0.235         | 0.243 |
| Ions                      | <i>q</i> (Ng) |       | <i>q</i> (B) |        | <i>q</i> (N) |       | <i>q</i> (Au) |       |
|                           | B3LYP         | MP2   | B3LYP        | MP2    | B3LYP        | MP2   | B3LYP         | MP2   |
| <b>HeBNAu<sup>+</sup></b> | 0.078         | 0.055 | −0.393       | −0.222 | 1.047        | 0.799 | 0.268         | 0.368 |
| <b>NeBNAu<sup>+</sup></b> | 0.193         | 0.191 | −0.620       | −0.430 | 1.168        | 0.881 | 0.259         | 0.358 |
| <b>ArBNAu<sup>+</sup></b> | 0.366         | 0.359 | −0.353       | −0.094 | 0.804        | 0.449 | 0.183         | 0.286 |
| <b>KrBNAu<sup>+</sup></b> | 0.315         | 0.282 | −0.254       | −0.067 | 0.787        | 0.536 | 0.153         | 0.249 |
| <b>XeBNAu<sup>+</sup></b> | 0.578         | 0.574 | −0.395       | −0.120 | 0.694        | 0.326 | 0.124         | 0.220 |
| <b>RnBNAu<sup>+</sup></b> | 0.564         | 0.569 | −0.397       | −0.124 | 0.723        | 0.349 | 0.110         | 0.206 |

**Table S6. Calculated Values of Atoms-in-Molecule (AIM) Charges<sup>a</sup> on the Constituent Atoms in the Predicted NgBNM<sup>+</sup> (Ng = He–Rn; M = H and Au) Ions as Obtained by Using B3LYP Method with the DEF2 Basis Set.**

| <b>Ions</b>        | <b><i>q</i>(Ng)</b> | <b><i>q</i>(B)</b> | <b><i>q</i>(N)</b> | <b><i>q</i>(H)</b> |
|--------------------|---------------------|--------------------|--------------------|--------------------|
| HeBNH <sup>+</sup> | −0.001              | 1.999              | −1.588             | 0.590              |
| NeBNH <sup>+</sup> | 0.044               | 2.014              | −1.643             | 0.585              |
| ArBNH <sup>+</sup> | 0.105               | 1.987              | −1.664             | 0.572              |
| KrBNH <sup>+</sup> | 0.189               | 1.917              | −1.671             | 0.565              |

<sup>a</sup>Since we have used the pseudo-potentials for Xe, Au, and Rn atoms, thereby, we have restricted our calculations for NgBNH<sup>+</sup> (Ng = He-Kr) only.



**Table S7. Calculated Values of the NBO Occupancy, Contribution from the Atoms Constructing that NBO, Atomic Contributions Towards that NBO and the Wiberg Bond Index (WBI) of Ng–B Bonds in NgBNM<sup>+</sup> (Ng = He–Rn; M = H and Au) Ions Calculated at B3LYP-D3/TZ2P Level.**

| Ions                | Bonds | NBO Occupancy | WBI  | Atomic Contribution (%) |          | Atomic Orbitals Contribution to NBO (%) |  |
|---------------------|-------|---------------|------|-------------------------|----------|-----------------------------------------|--|
|                     |       |               |      |                         |          |                                         |  |
| HeBNH <sup>+</sup>  | He–B  | 1.995         | 0.51 | He (85.3)               | s (99.9) | p (0.1)                                 |  |
|                     |       |               |      | B (14.7)                | s (43.2) | p (56.4)                                |  |
| NeBNH <sup>+</sup>  | Ne–B  | 1.997         | 0.45 | Ne (89.4)               | s (29.7) | p (70.1)                                |  |
|                     |       |               |      | B (10.6)                | s (42.4) | p (57.1)                                |  |
| ArBNH <sup>+</sup>  | Ar–B  | 1.997         | 0.87 | Ar (77.0)               | s (20.7) | p (78.8)                                |  |
|                     |       |               |      | B (23.0)                | s (44.8) | p (54.9)                                |  |
| KrBNH <sup>+</sup>  | Kr–B  | 1.997         | 0.96 | Kr (72.8)               | s (15.9) | p (83.5)                                |  |
|                     |       |               |      | B (27.2)                | s (45.6) | p (54.1)                                |  |
| XeBNH <sup>+</sup>  | Xe–B  | 1.997         | 1.07 | Xe (67.0)               | s (13.5) | p (86.0)                                |  |
|                     |       |               |      | B (33.0)                | s (47.0) | p (52.7)                                |  |
| RnBNH <sup>+</sup>  | Rn–B  | 1.997         | 1.09 | Rn (65.2)               | s (9.5)  | p (90.2)                                |  |
|                     |       |               |      | B (34.8)                | s (47.8) | p (51.9)                                |  |
| Ions                | Bonds | NBO Occupancy | WBI  | Atomic Contribution (%) |          | Atomic Orbitals Contribution to NBO (%) |  |
| HeBNAu <sup>+</sup> | He–B  | 1.995         | 0.51 | He (85.6)               | s (99.9) | p (0.1)                                 |  |
|                     |       |               |      | B (14.5)                | s (42.7) | p (56.8)                                |  |
| NeBNAu <sup>+</sup> | Ne–B  | 1.996         | 0.41 | Ne (90.1)               | s (29.7) | p (70.2)                                |  |
|                     |       |               |      | B (9.9)                 | s (40.9) | p (58.6)                                |  |
| ArBNAu <sup>+</sup> | Ar–B  | 1.996         | 0.83 | Ar (78.0)               | s (21.4) | p (78.1)                                |  |
|                     |       |               |      | B (22.0)                | s (44.4) | p (55.3)                                |  |
| KrBNAu <sup>+</sup> | Kr–B  | 1.996         | 0.93 | Kr (74.1)               | s (16.8) | p (82.8)                                |  |
|                     |       |               |      | B (25.9)                | s (45.2) | p (54.5)                                |  |
| XeBNAu <sup>+</sup> | Xe–B  | 1.996         | 1.03 | Xe (68.2)               | s (14.7) | p (85.8)                                |  |
|                     |       |               |      | B (32.8)                | s (46.5) | p (53.1)                                |  |
| RnBNAu <sup>+</sup> | Rn–B  | 1.996         | 1.06 | Rn (66.8)               | s (10.2) | p (89.4)                                |  |
|                     |       |               |      | B (33.2)                | s (47.3) | p (52.4)                                |  |

**Table S8. Calculated Values of Ng–B, B–N and N–Cu Bond Lengths (in Å) in the Predicted NgBNCu<sup>+</sup> (Ng = He, Ne, Ar, Kr, Xe, and Rn) Ions as Obtained by Using B3LYP and MP2 Methods with DEF2 Basis Set and CCSD(T) Method with AVTZ Basis Set.**

| <b>Ions</b>               | <b>Method</b>  | <b>R (Ng–B)</b> | <b>R (B–N)</b> | <b>R (N–Cu)</b> |
|---------------------------|----------------|-----------------|----------------|-----------------|
| <b>HeBNCu<sup>+</sup></b> | <b>B3LYP</b>   | 1.241           | 1.223          | 1.848           |
|                           | <b>MP2</b>     | 1.241           | 1.248          | 1.831           |
|                           | <b>CCSD(T)</b> | 1.245           | 1.240          | 1.836           |
| <b>NeBNCu<sup>+</sup></b> | <b>B3LYP</b>   | 1.551           | 1.225          | 1.845           |
|                           | <b>MP2</b>     | 1.550           | 1.249          | 1.828           |
|                           | <b>CCSD(T)</b> | 1.547           | 1.240          | 1.834           |
| <b>ArBNCu<sup>+</sup></b> | <b>B3LYP</b>   | 1.789           | 1.228          | 1.835           |
|                           | <b>MP2</b>     | 1.783           | 1.250          | 1.816           |
|                           | <b>CCSD(T)</b> | 1.794           | 1.242          | 1.822           |
| <b>KrBNCu<sup>+</sup></b> | <b>B3LYP</b>   | 1.933           | 1.230          | 1.832           |
|                           | <b>MP2</b>     | 1.922           | 1.252          | 1.812           |
|                           | <b>CCSD(T)</b> | 1.927           | 1.244          | 1.818           |
| <b>XeBNCu<sup>+</sup></b> | <b>B3LYP</b>   | 2.108           | 1.232          | 1.827           |
|                           | <b>MP2</b>     | 2.092           | 1.254          | 1.806           |
|                           | <b>CCSD(T)</b> | 2.104           | 1.247          | 1.813           |
| <b>RnBNCu<sup>+</sup></b> | <b>B3LYP</b>   | 2.200           | 1.234          | 1.825           |
|                           | <b>MP2</b>     | 2.185           | 1.256          | 1.804           |
|                           | <b>CCSD(T)</b> | 2.195           | 1.248          | 1.811           |

**Table S9. Calculated Values of Ng–B, B–N and N–Ag Bond Lengths (in Å) in the Predicted NgBNAg<sup>+</sup> (Ng = He, Ne, Ar, Kr, Xe, and Rn) Ions as Obtained by Using B3LYP and MP2 Methods with DEF2 Basis Set and CCSD(T) Method with AVTZ Basis Set.**

| <b>Ions</b>               | <b>Method</b>  | <b>R (Ng–B)</b> | <b>R (B–N)</b> | <b>R (N–Ag)</b> |
|---------------------------|----------------|-----------------|----------------|-----------------|
| <b>HeBNAg<sup>+</sup></b> | <b>B3LYP</b>   | 1.244           | 1.224          | 2.089           |
|                           | <b>MP2</b>     | 1.246           | 1.252          | 2.086           |
|                           | <b>CCSD(T)</b> | 1.251           | 1.243          | 2.108           |
| <b>NeBNAg<sup>+</sup></b> | <b>B3LYP</b>   | 1.558           | 1.226          | 2.082           |
|                           | <b>MP2</b>     | 1.563           | 1.253          | 2.079           |
|                           | <b>CCSD(T)</b> | 1.563           | 1.244          | 2.102           |
| <b>ArBNAg<sup>+</sup></b> | <b>B3LYP</b>   | 1.793           | 1.228          | 2.068           |
|                           | <b>MP2</b>     | 1.788           | 1.252          | 2.061           |
|                           | <b>CCSD(T)</b> | 1.801           | 1.245          | 2.083           |
| <b>KrBNAg<sup>+</sup></b> | <b>B3LYP</b>   | 1.936           | 1.230          | 2.062           |
|                           | <b>MP2</b>     | 1.927           | 1.254          | 2.055           |
|                           | <b>CCSD(T)</b> | 1.933           | 1.246          | 2.077           |
| <b>XeBNAg<sup>+</sup></b> | <b>B3LYP</b>   | 2.111           | 1.232          | 2.056           |
|                           | <b>MP2</b>     | 2.096           | 1.257          | 2.048           |
|                           | <b>CCSD(T)</b> | 2.108           | 1.249          | 2.071           |
| <b>RnBNAg<sup>+</sup></b> | <b>B3LYP</b>   | 2.203           | 1.233          | 2.052           |
|                           | <b>MP2</b>     | 2.188           | 1.258          | 2.045           |
|                           | <b>CCSD(T)</b> | 2.199           | 1.250          | 2.067           |

**Table S10. Calculated Values of Ng–B, B–N, N–M Stretch and Ng–B–N, N–B–M Bending Frequencies (in cm<sup>-1</sup>) along with their Corresponding IR Intensities (in km mol<sup>-1</sup>) are Provided within the Parenthesis in the Predicted NgBNM<sup>+</sup> (Ng = He–Rn; M = Cu and Ag) Ions as Obtained by Using B3LYP and MP2 Methods with the DEF2 Basis Set.**

| Ions                | Ng–B Stretch    |                 | B–N Stretch      |                  | N–Cu Stretch    |                 | Ng–B–N Bend     |                 | B–N–Cu Bend     |                 |
|---------------------|-----------------|-----------------|------------------|------------------|-----------------|-----------------|-----------------|-----------------|-----------------|-----------------|
|                     | B3LYP           | MP2             | B3LYP            | MP2              | B3LYP           | MP2             | B3LYP           | MP2             | B3LYP           | MP2             |
| HeBNCu <sup>+</sup> | 1182.9<br>(0.1) | 1185.0<br>(1.3) | 1991.3<br>(3.5)  | 1827.5<br>(0.1)  | 540.5<br>(0.1)  | 544.5<br>(0.8)  | 212.0<br>(7.4)  | 200.3<br>(0.2)  | 197.6<br>(51.0) | 169.1<br>(55.3) |
| NeBNCu <sup>+</sup> | 639.4<br>(28.6) | 672.1<br>(19.9) | 1976.4<br>(39.2) | 1828.3<br>(16.4) | 545.7<br>(12.2) | 552.9<br>(12.0) | 159.2<br>(6.7)  | 178.0<br>(17.8) | 184.6<br>(28.4) | 149.1<br>(12.2) |
| ArBNCu <sup>+</sup> | 685.9<br>(1.3)  | 727.0<br>(1.2)  | 1966.3<br>(60.9) | 1836.6<br>(24.2) | 567.1<br>(4.5)  | 574.2<br>(6.1)  | 220.2<br>(22.6) | 207.7<br>(15.8) | 189.6<br>(12.3) | 169.0<br>(16.8) |
| KrBNCu <sup>+</sup> | 630.3<br>(0.1)  | 674.5<br>(0.1)  | 1957.5<br>(66.8) | 1828.5<br>(22.1) | 573.1<br>(5.4)  | 580.3<br>(6.6)  | 217.8<br>(20.5) | 205.1<br>(15.5) | 189.7<br>(10.4) | 170.9<br>(12.0) |
| XeBNCu <sup>+</sup> | 593.8<br>(2.2)  | 638.7<br>(3.7)  | 1943.3<br>(66.3) | 1815.5<br>(16.2) | 580.5<br>(4.2)  | 587.6<br>(5.2)  | 210.9<br>(17.4) | 201.4<br>(15.3) | 188.5<br>(12.6) | 170.6<br>(14.3) |
| RnBNCu <sup>+</sup> | 563.2<br>(3.3)  | 606.1<br>(5.9)  | 1937.0<br>(75.7) | 1810.0<br>(19.0) | 584.1<br>(5.0)  | 591.5<br>(5.8)  | 203.2<br>(17.6) | 194.6<br>(13.7) | 185.3<br>(13.0) | 166.9<br>(14.8) |
| Ions                | Ng–B Stretch    |                 | B–N Stretch      |                  | N–Ag Stretch    |                 | Ng–B–N Bend     |                 | B–N–Ag Bend     |                 |
|                     | B3LYP           | MP2             | B3LYP            | MP2              | B3LYP           | MP2             | B3LYP           | MP2             | B3LYP           | MP2             |
| HeBNAg <sup>+</sup> | 1165.0<br>(0.2) | 1157.0<br>(1.7) | 1990.5<br>(6.5)  | 1806.2<br>(7.8)  | 440.7<br>(1.0)  | 451.5<br>(3.1)  | 238.8<br>(1.1)  | 208.1<br>(3.4)  | 160.2<br>(53.7) | 124.3<br>(49.3) |
| NeBNAg <sup>+</sup> | 629.5<br>(24.8) | 648.0<br>(19.0) | 1973.2<br>(40.2) | 1800.2<br>(11.3) | 446.9<br>(7.4)  | 459.1<br>(11.1) | 186.3<br>(23.2) | 181.6<br>(10.9) | 147.9<br>(9.8)  | 100.5<br>(15.2) |
| ArBNAg <sup>+</sup> | 679.1<br>(0.5)  | 718.3<br>(0.4)  | 1966.5<br>(64.1) | 1819.3<br>(20.3) | 468.2<br>(3.7)  | 480.6<br>(5.8)  | 230.6<br>(17.1) | 209.9<br>(10.7) | 150.6<br>(12.8) | 124.8<br>(14.9) |
| KrBNAg <sup>+</sup> | 625.5<br>(0.1)  | 668.7<br>(0.5)  | 1958.2<br>(69.3) | 1812.5<br>(17.9) | 474.2<br>(4.1)  | 486.6<br>(5.8)  | 227.5<br>(16.3) | 208.7<br>(10.7) | 149.0<br>(10.5) | 125.8<br>(12.5) |
| XeBNAg <sup>+</sup> | 590.6<br>(3.9)  | 634.7<br>(6.7)  | 1945.0<br>(68.3) | 1801.1<br>(12.1) | 481.2<br>(3.5)  | 493.7<br>(4.9)  | 218.1<br>(13.5) | 203.1<br>(8.8)  | 147.9<br>(10.9) | 127.0<br>(12.8) |
| RnBNAg <sup>+</sup> | 560.5<br>(5.3)  | 603.1<br>(9.2)  | 1938.8<br>(76.2) | 1795.8<br>(13.5) | 484.9<br>(4.1)  | 497.7<br>(5.3)  | 210.7<br>(11.8) | 197.2<br>(7.6)  | 145.0<br>(11.0) | 124.4<br>(13.1) |

**Table S11. Calculated Values of Ng–B Binding Energies (BE) (in kJ mol<sup>-1</sup>) in the Predicted NgBNCu<sup>+</sup> and NgBNAg<sup>+</sup> (Ng = He–Rn) Ions as Obtained by Using B3LYP and MP2 Methods with the DEF2 Basis Set and CCSD(T) Method with AVTZ Basis Set.**

| Ions                | BE (Ng–B) |       |         | BE (Ng–B) <sup>a</sup> |       |         |
|---------------------|-----------|-------|---------|------------------------|-------|---------|
|                     | B3LYP     | MP2   | CCSD(T) | B3LYP                  | MP2   | CCSD(T) |
| HeBNCu <sup>+</sup> | 76.9      | 79.1  | 63.2    | 50.8                   | 54.4  | 39.0    |
| NeBNCu <sup>+</sup> | 61.5      | 68.5  | 53.3    | 40.1                   | 47.9  | 33.5    |
| ArBNCu <sup>+</sup> | 183.5     | 199.1 | 179.3   | 161.4                  | 177.8 | 157.9   |
| KrBNCu <sup>+</sup> | 219.4     | 238.8 | 220.2   | 197.8                  | 217.6 | 199.4   |
| XeBNCu <sup>+</sup> | 267.8     | 291.4 | 274.8   | 246.6                  | 271.0 | 254.0   |
| RnBNCu <sup>+</sup> | 284.7     | 308.8 | 293.4   | 263.9                  | 288.7 | 272.8   |
| Ions                | BE (Ng–B) |       |         | BE (Ng–B) <sup>a</sup> |       |         |
|                     | B3LYP     | MP2   | CCSD(T) | B3LYP                  | MP2   | CCSD(T) |
| HeBNAg <sup>+</sup> | 81.5      | 66.4  | 61.5    | 56.3                   | 43.0  | 38.6    |
| NeBNAg <sup>+</sup> | 65.8      | 55.3  | 51.2    | 45.3                   | 36.1  | 33.0    |
| ArBNAg <sup>+</sup> | 184.0     | 181.0 | 171.7   | 162.9                  | 161.0 | 153.2   |
| KrBNAg <sup>+</sup> | 218.9     | 219.6 | 211.1   | 198.3                  | 199.5 | 191.5   |
| XeBNAg <sup>+</sup> | 266.0     | 270.8 | 263.9   | 245.8                  | 251.6 | 244.5   |
| RnBNAg <sup>+</sup> | 282.4     | 287.5 | 281.7   | 262.6                  | 268.6 | 262.5   |

<sup>a</sup>Corresponds to the zero point energy (ZPE) corrected Ng–B binding energy.

**Table S12. Calculated Values of NBO Charges on the Constituent Atoms in the Predicted NgBNM<sup>+</sup> (Ng = He–Rn; M = Cu and Ag) Ions as Obtained by Using B3LYP and MP2 Methods with the AVTZ Basis Set Using MOLPRO Program.**

| Ions                | <i>q</i> (Ng) |       | <i>q</i> (B) |       | <i>q</i> (N) |        | <i>q</i> (Cu) |       |
|---------------------|---------------|-------|--------------|-------|--------------|--------|---------------|-------|
|                     | B3LYP         | MP2   | B3LYP        | MP2   | B3LYP        | MP2    | B3LYP         | MP2   |
| HeBNCu <sup>+</sup> | 0.287         | 0.274 | 0.836        | 0.821 | −1.067       | −1.053 | 0.944         | 0.959 |
| NeBNCu <sup>+</sup> | 0.226         | 0.223 | 1.013        | 0.984 | −1.179       | −1.162 | 0.940         | 0.955 |
| ArBNCu <sup>+</sup> | 0.504         | 0.509 | 0.685        | 0.644 | −1.108       | −1.093 | 0.919         | 0.940 |
| KrBNCu <sup>+</sup> | 0.590         | 0.598 | 0.614        | 0.564 | −1.118       | −1.099 | 0.914         | 0.937 |
| XeBNCu <sup>+</sup> | 0.713         | 0.732 | 0.505        | 0.437 | −1.125       | −1.101 | 0.908         | 0.932 |
| RnBNCu <sup>+</sup> | 0.742         | 0.763 | 0.504        | 0.433 | −1.149       | −1.125 | 0.904         | 0.929 |
| Ions                | <i>q</i> (Ng) |       | <i>q</i> (B) |       | <i>q</i> (N) |        | <i>q</i> (Ag) |       |
|                     | B3LYP         | MP2   | B3LYP        | MP2   | B3LYP        | MP2    | B3LYP         | MP2   |
| HeBNAg <sup>+</sup> | 0.285         | 0.271 | 0.812        | 0.786 | −1.053       | −1.027 | 0.957         | 0.970 |
| NeBNAg <sup>+</sup> | 0.222         | 0.217 | 0.990        | 0.952 | −1.168       | −1.137 | 0.955         | 0.969 |
| ArBNAg <sup>+</sup> | 0.498         | 0.500 | 0.664        | 0.614 | −1.098       | −1.069 | 0.936         | 0.955 |
| KrBNAg <sup>+</sup> | 0.582         | 0.588 | 0.594        | 0.534 | −1.108       | −1.074 | 0.932         | 0.952 |
| XeBNAg <sup>+</sup> | 0.703         | 0.720 | 0.487        | 0.408 | −1.115       | −1.076 | 0.926         | 0.947 |
| RnBNAg <sup>+</sup> | 0.731         | 0.750 | 0.486        | 0.405 | −1.139       | −1.100 | 0.922         | 0.945 |

**Table S13. Calculated Values of Ng–B Bond Critical Point (BCP) Electron Density ( $\rho$  in  $e a_0^{-3}$ ), Laplacian of Electron Density ( $\nabla^2\rho$  in  $e a_0^{-5}$ ), the Local Electron Energy Density ( $E_d$  in a.u.), and Ratio of Local Electron Kinetic Energy Density and Electron Density ( $G/\rho$  in a.u.) in the Predicted NgBNM<sup>+</sup> (Ng = He–Rn; M = Cu and Ag) Complexes as Obtained by Using B3LYP and MP2 Methods with the DEF2 Basis Set.**

| Complexes           | $\rho$ |       | $\nabla^2\rho$ |        | $E_d$  |        | $G/\rho$ |       |
|---------------------|--------|-------|----------------|--------|--------|--------|----------|-------|
|                     | B3LYP  | MP2   | B3LYP          | MP2    | B3LYP  | MP2    | B3LYP    | MP2   |
| HeBNCu <sup>+</sup> | 0.095  | 0.091 | 0.859          | 0.955  | −0.026 | −0.017 | 2.537    | 2.802 |
| NeBNCu <sup>+</sup> | 0.073  | 0.069 | 0.625          | 0.702  | −0.021 | −0.013 | 2.425    | 2.725 |
| ArBNCu <sup>+</sup> | 0.105  | 0.104 | 0.299          | 0.385  | −0.079 | −0.075 | 1.457    | 1.654 |
| KrBNCu <sup>+</sup> | 0.104  | 0.104 | 0.079          | 0.169  | −0.090 | −0.089 | 1.058    | 1.260 |
| XeBNCu <sup>+</sup> | 0.105  | 0.107 | −0.134         | −0.072 | −0.094 | −0.103 | 0.571    | 0.794 |
| RnBNCu <sup>+</sup> | 0.100  | 0.102 | −0.162         | −0.174 | −0.074 | −0.092 | 0.333    | 0.471 |
| Complexes           | $\rho$ |       | $\nabla^2\rho$ |        | $E_d$  |        | $G/\rho$ |       |
|                     | B3LYP  | MP2   | B3LYP          | MP2    | B3LYP  | MP2    | B3LYP    | MP2   |
| HeBNAg <sup>+</sup> | 0.093  | 0.089 | 0.854          | 0.946  | −0.025 | −0.015 | 2.532    | 2.831 |
| NeBNAg <sup>+</sup> | 0.071  | 0.066 | 0.616          | 0.676  | −0.019 | −0.011 | 2.437    | 2.727 |
| ArBNAg <sup>+</sup> | 0.104  | 0.102 | 0.302          | 0.388  | −0.077 | −0.073 | 1.462    | 1.667 |
| KrBNAg <sup>+</sup> | 0.103  | 0.102 | 0.085          | 0.177  | −0.088 | −0.086 | 1.058    | 1.284 |
| XeBNAg <sup>+</sup> | 0.104  | 0.105 | −0.126         | −0.060 | −0.092 | −0.100 | 0.587    | 0.810 |
| RnBNAg <sup>+</sup> | 0.100  | 0.101 | −0.159         | −0.163 | −0.074 | −0.096 | 0.340    | 0.495 |

**Table S14: EDA-NOCV Results of NgBNM<sup>+</sup> (Ng = He–Rn; M = Cu and Ag) Ions Considering Ng as One Fragment and BNM<sup>+</sup> as Another Fragment at the B3LYP-D3/TZ2P Level of Theory. All Energy Terms are Expressed in kcal mol<sup>-1</sup>.**

| <b>Ions</b>         | $\Delta E^{\text{Pauli}}$ | $\Delta E^{\text{elstat}}$ | $\Delta E_{\text{T}^{\text{orb}}}$ | $\Delta E_{1^{\text{orb}}}$ | $\Delta E_{2^{\text{orb}}}$ | $\Delta E_{3^{\text{orb}}}$ | $\Delta E_{4^{\text{orb}}}$ | $\Delta E_{5^{\text{orb}}}$ | $\Delta E_{6^{\text{orb}}}$ | $\Delta E_{7^{\text{orb}}}$ | $\Delta E^{\text{disp}}$ | $\Delta E^{\text{int}}$ |
|---------------------|---------------------------|----------------------------|------------------------------------|-----------------------------|-----------------------------|-----------------------------|-----------------------------|-----------------------------|-----------------------------|-----------------------------|--------------------------|-------------------------|
| HeBNCu <sup>+</sup> | 62.2                      | -13.1                      | -65.9                              | -38.1                       | -21.9                       | -2.4                        | -2.4                        | -0.5                        | ... <sup>a</sup>            | ... <sup>a</sup>            | -0.1                     | -16.9                   |
| NeBNCu <sup>+</sup> | 64.4                      | -24.8                      | -53.1                              | -32.4                       | -9.6                        | -4.1                        | -4.1                        | -1.0                        | -1.0                        | -0.3                        | -0.2                     | -13.7                   |
| ArBNCu <sup>+</sup> | 91.2                      | -32.8                      | -102.4                             | -66.7                       | -13.9                       | -9.9                        | -9.9                        | -0.2                        | -0.2                        | -0.5                        | -0.6                     | -44.5                   |
| KrBNCu <sup>+</sup> | 91.0                      | -32.5                      | -111.8                             | -77.3                       | -11.7                       | -10.1                       | -10.1                       | -0.1                        | -0.1                        | ... <sup>a</sup>            | -0.7                     | -53.9                   |
| XeBNCu <sup>+</sup> | 88.8                      | -30.6                      | -123.1                             | -91.8                       | -9.9                        | -9.9                        | -9.9                        | -0.1                        | -0.1                        | -0.4                        | -0.8                     | -65.8                   |
| RnBNCu <sup>+</sup> | 83.3                      | -28.8                      | -123.8                             | -96.7                       | -8.3                        | -8.9                        | -8.9                        | -0.1                        | -0.1                        | ... <sup>a</sup>            | -1.0                     | -70.2                   |
| <b>Ions</b>         | $\Delta E^{\text{Pauli}}$ | $\Delta E^{\text{elstat}}$ | $\Delta E_{\text{T}^{\text{orb}}}$ | $\Delta E_{1^{\text{orb}}}$ | $\Delta E_{2^{\text{orb}}}$ | $\Delta E_{3^{\text{orb}}}$ | $\Delta E_{4^{\text{orb}}}$ | $\Delta E_{5^{\text{orb}}}$ | $\Delta E_{6^{\text{orb}}}$ | $\Delta E_{7^{\text{orb}}}$ | $\Delta E^{\text{disp}}$ | $\Delta E^{\text{int}}$ |
| HeBNAg <sup>+</sup> | 52.8                      | -10.6                      | -59.6                              | -37.6                       | -17.7                       | -2.0                        | -2.0                        | ... <sup>a</sup>            | ... <sup>a</sup>            | ... <sup>a</sup>            | -0.0                     | -17.3                   |
| NeBNAg <sup>+</sup> | 53.8                      | -19.8                      | -48.0                              | -31.5                       | -6.9                        | -4.2                        | -4.2                        | -0.4                        | -0.4                        | ... <sup>a</sup>            | -0.1                     | -14.1                   |
| ArBNAg <sup>+</sup> | 80.2                      | -26.9                      | -96.2                              | -66.3                       | -10.0                       | -9.3                        | -9.3                        | -0.2                        | -0.2                        | ... <sup>a</sup>            | -0.4                     | -43.3                   |
| KrBNAg <sup>+</sup> | 80.6                      | -26.7                      | -105.7                             | -76.6                       | -8.4                        | -9.4                        | -9.4                        | -0.1                        | -0.1                        | ... <sup>a</sup>            | -0.6                     | -52.4                   |
| XeBNAg <sup>+</sup> | 79.4                      | -25.3                      | -117.1                             | -90.4                       | -7.2                        | -9.3                        | -9.3                        | -0.1                        | -0.1                        | -0.4                        | -0.7                     | -63.7                   |
| RnBNAg <sup>+</sup> | 74.8                      | -23.8                      | -118.1                             | -95.0                       | -5.9                        | -8.3                        | -8.3                        | -0.1                        | -0.1                        | ... <sup>a</sup>            | -0.9                     | -67.9                   |

<sup>a</sup>The corresponding value is below the cut-off value of ADF to be listed in the EDA-NOCV results.
